# Supplementary material for: Partial Recovery of Telomere Length After Long-term Virologic Suppression in Persons With HIV-1
Source: PubMed Central journal article supplement (PMC11482007; doi:10.1093/ofid/ofae550), 2024-09-23
Supplement: ofae550_supplementary_data.pdf [file ofae550_supplementary_data.pdf]

## Supplementary Material

### Table of Contents

#### Supplementary Figures

- Supplementary Figure 1. Correlation between age and blood telomere length in the elderly population. **Page 2.**
- Supplementary Figure 2. Spaghetti plot of individual changes of blood telomere length in persons with HIV-1, at baseline and after six years of follow up. **Page 3.**
- Supplementary Figure 3. Comparison of blood telomere length in persons with HIV-1 with their age and sex-matched blood donors. Factors associated with similar blood telomere length (Univariate Analysis). **Page 4.**
- Supplementary Figure 4. Comparison of blood telomere length in Persons with HIV-1 with elderly general population over 60 years. Factors associated with similar blood telomere length (Univariate and multivariate analysis). **Page 5.**
- Supplementary Figure 5. Correlation between blood telomere length at baseline and after six years of follow-up in persons with HIV-1. **Page 6.**

#### Supplementary Tables

- Supplementary Table 1. Factors associated with blood telomere length (T/S) at six years of follow-up. **Page 7.**
- Supplementary Table 2. Factors associated with changes in blood telomere length (T/S) after six years of follow-up. **Page 9.**
- Supplementary Table 3. Factors associated with similarity of blood telomere length to healthy blood donors (within an established range of  $\pm 10\%$ ). **Page 11.**
- Supplementary Table 4. Factors associated with similarity of blood telomere length to the elderly population group (within an established range of  $\pm 10\%$ ). **Page 13.**

**Supplementary Figure 1. Correlation between age and blood telomere length in the elderly population.**

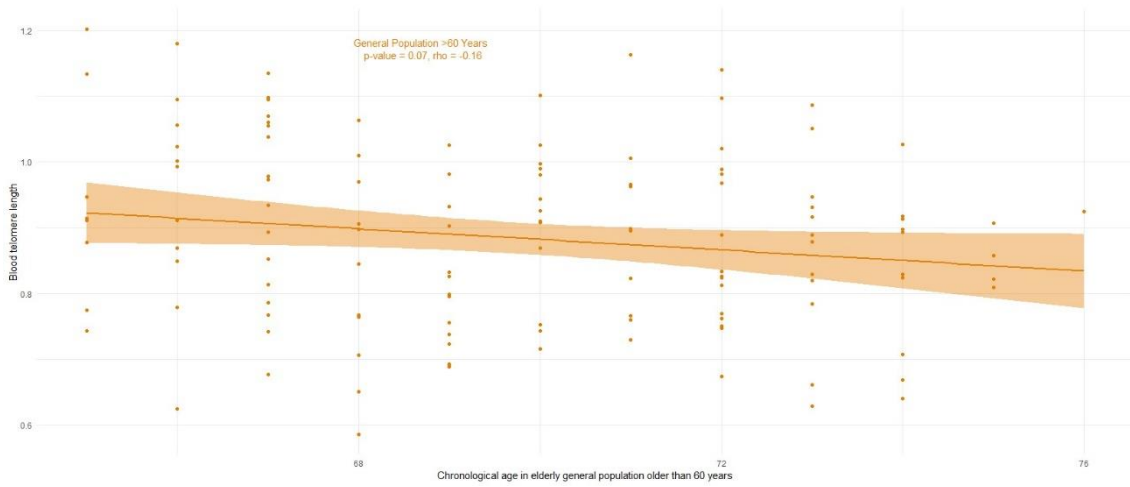

Correlation between age and blood telomere length (BTL) of the elderly population over 60 years group. Orange dots show individual data and the orange line the correlation curve. The shaded areas represent the 95% confidence interval.

**Supplementary Figure 2. Spaghetti plot of individual changes of blood telomere length in persons with HIV-1, at baseline and after six years of follow up.**

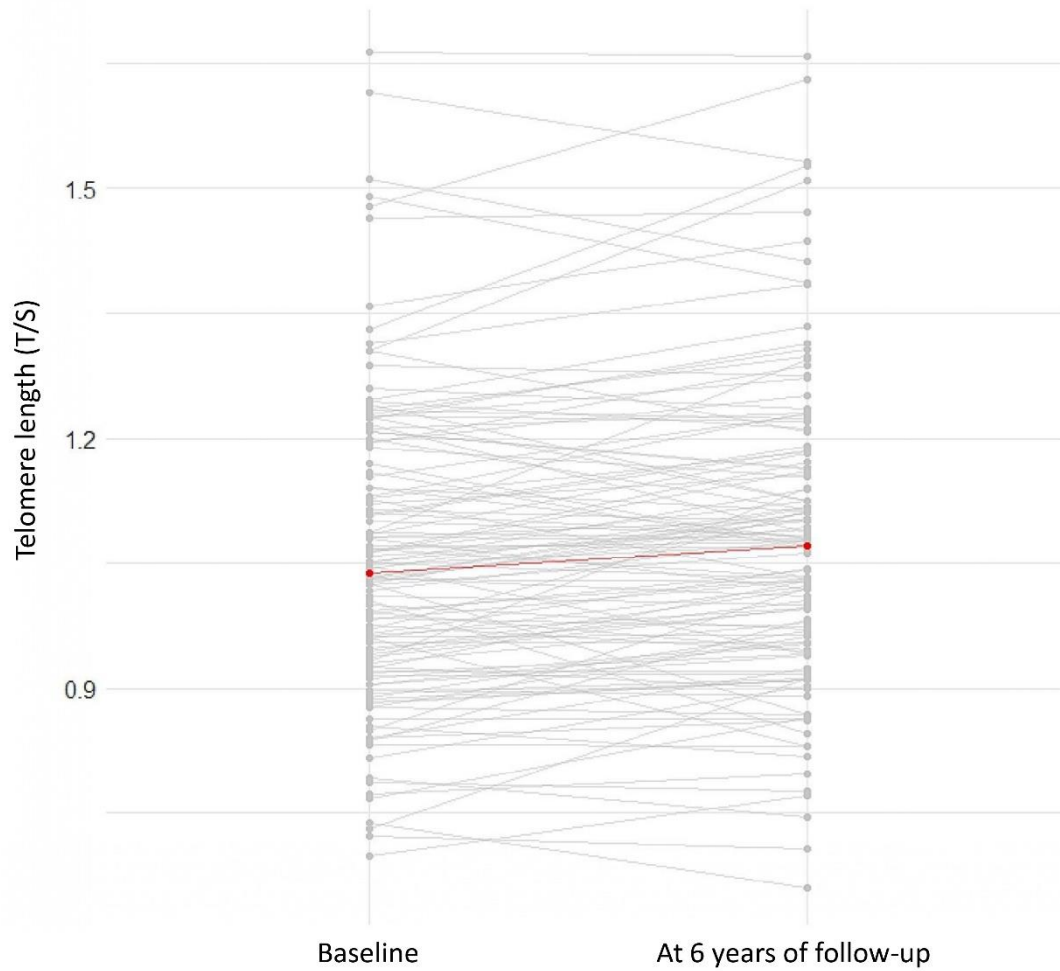

This spaghetti plot represents individual (gray lines) and median (red line) changes in blood telomere length (BTL) in people with HIV-1 (PWH) at baseline and 6-year follow-up.

**Supplementary Figure 3. Comparison of blood telomere length in persons with HIV-1 with their age and sex-matched blood donors. Factors associated with similar blood telomere length (Univariate Analysis).**

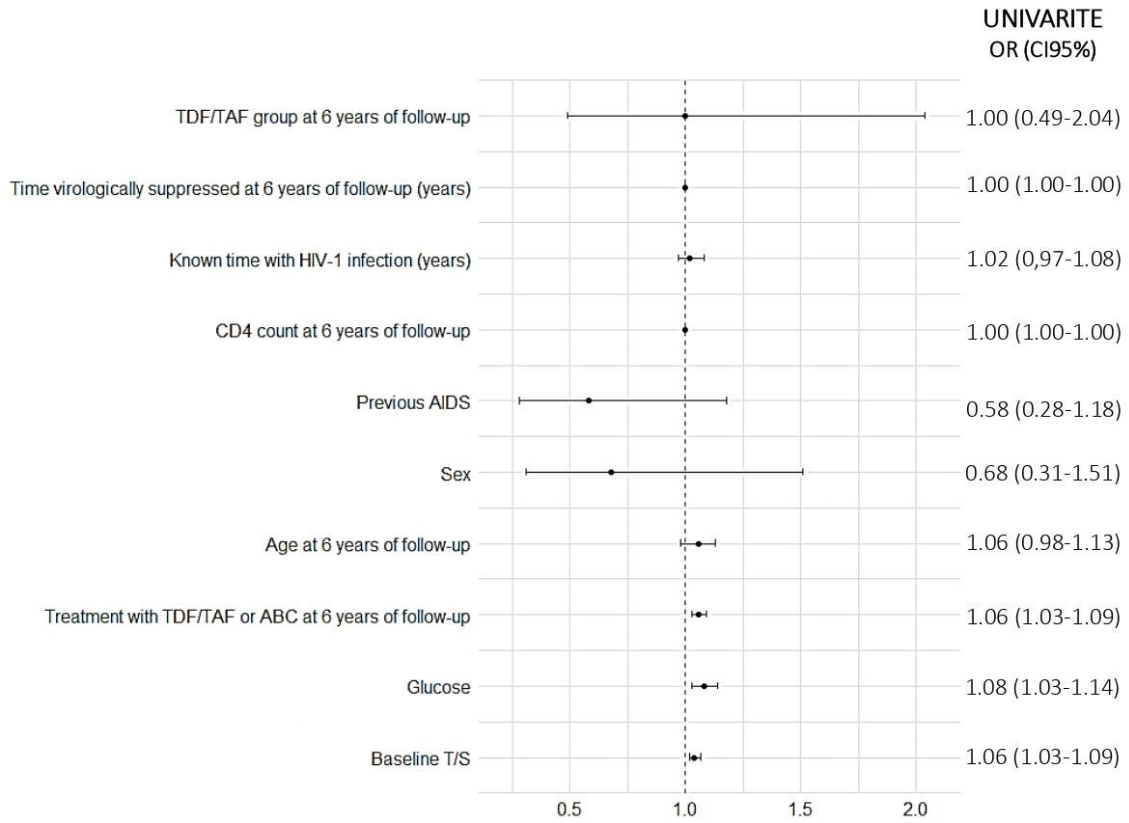

This forest plot shows the factors associated with the similarity of blood telomere length (BTL) of the people with HIV-1 (PWH) group with that of blood donors. For the comparison with blood donors “similar” refers to those PWH (median age 55 years), whose BTL falls within a range of  $\pm 10\%$  or greater than the BTL observed in their age and sex-matched blood donor.

**Supplementary Figure 4. Comparison of blood telomere length in Persons with HIV-1 with elderly general population over 60 years. Factors associated with similar blood telomere length (Univariate and multivariate analysis).**

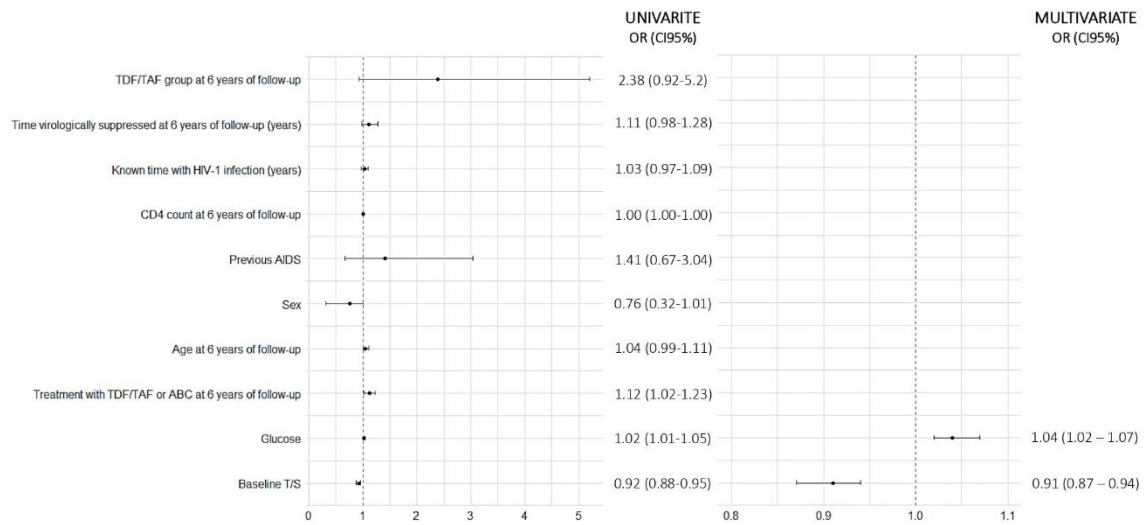

This forest plot shows the factors associated with the similarity of blood telomere length (BTL) of the people with HIV-1 (PWH) group with the elderly population group (over 60 years). For the comparison with the elderly population group “similar” refers to those PWH (median age 55 years), whose BTL falls within a range of  $\pm 10\%$  or less than the median BTL observed in the elderly general population group (median age 70 years).

**Supplementary Figure 5. Correlation between blood telomere length at baseline and after six years of follow-up in persons with HIV-1.**

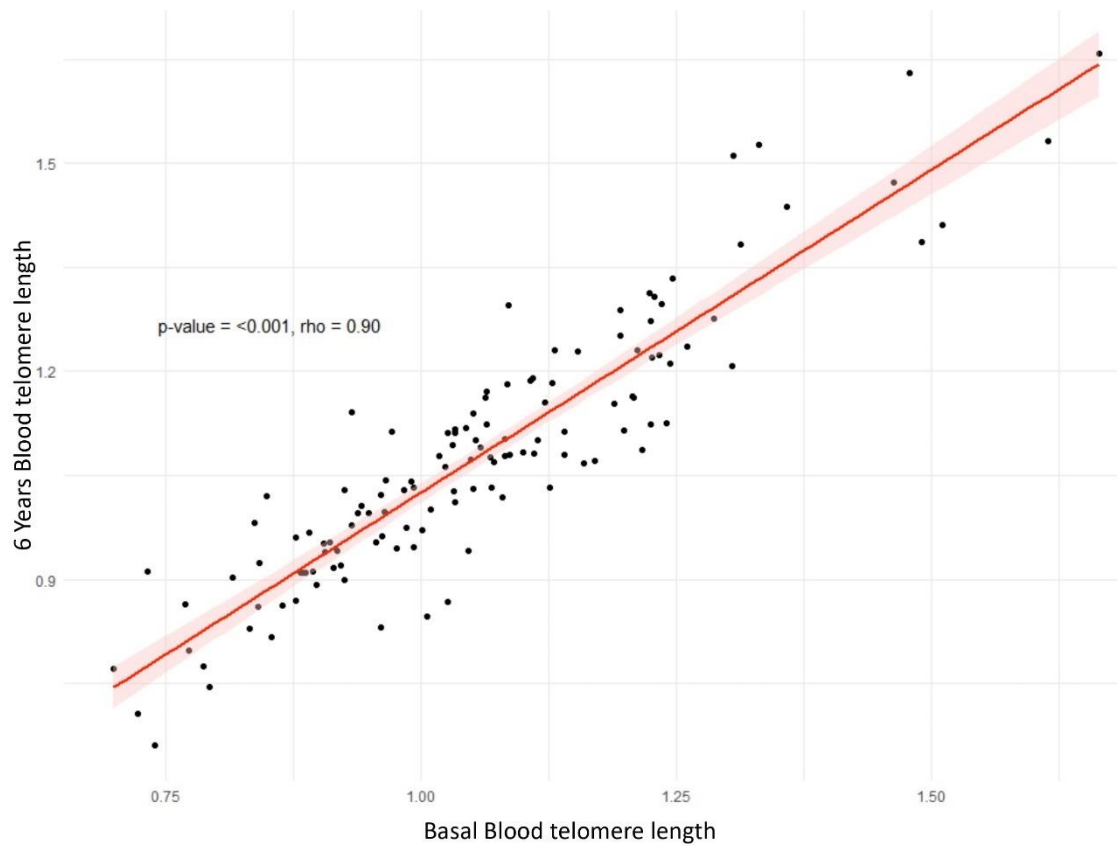

Correlation between blood telomere length (BTL) at baseline and after six years of follow-up in people with HIV-1 (PWH). Black dots show individual data and the red line the correlation curve. The shaded areas represent the 95% confidence interval.

**Supplementary Table 1. Factors associated with blood telomere length (T/S) at six years of follow-up.**

| Variable                                   | Coefficient | Std. Error | p       |
|--------------------------------------------|-------------|------------|---------|
| Baseline blood telomere length (T/S) x100  | 0.00957     | 0.00075    | 0.00000 |
| Baseline Age                               | -0.00745    | 0.00221    | 0.00102 |
| Change in blood telomere length (T/S) x100 | 0.00537     | 0.00321    | 0.09639 |
| Age at 6 years of follow-up                | -0.00745    | 0.00204    | 0.00204 |
| Sex (Female)                               | 0.05056     | 0.05922    | 0.39488 |
| Ethnicity (caucasian)                      | -0.03369    | 0.05640    | 0.55138 |
| Risk factor (parenteral)                   | -0.03173    | 0.18187    | 0.86179 |
| Risk factor (sexual)                       | -0.02798    | 0.17931    | 0.87625 |
| Income ( $\leq$ 12,000€/year)              | 0.05243     | 0.03686    | 0.15739 |
| Previous AIDS                              | 0.00846     | 0.03150    | 0.78877 |
| Education (university)                     | -0.03575    | 0.04620    | 0.44049 |
| Education (secondary)                      | -0.00339    | 0.03568    | 0.92451 |
| Treatment with statins                     | -0.04584    | 0.03300    | 0.16727 |
| Treatment with metformin                   | -0.04703    | 0.03944    | 0.23529 |
| Active hepatitis C                         | -0.05931    | 0.03483    | 0.09104 |
| Resolved hepatitis C                       | -0.01484    | 0.03490    | 0.67145 |
| Body mass index                            | -0.00066    | 0.00425    | 0.87699 |
| Smoker (current)                           | -0.02557    | 0.04691    | 0.58664 |
| Smoker (formerly)                          | -0.07571    | 0.05209    | 0.14864 |
| Smoker (current and formerly)              | -0.03774    | 0.04754    | 0.42882 |
| Smoker (years)                             | -0.00276    | 0.00170    | 0.10778 |
| Smoker (pack years)                        | -0.00095    | 0.00053    | 0.07496 |
| Alcohol (current)                          | -0.13106    | 0.07531    | 0.08427 |
| Alcohol (formerly)                         | -0.00186    | 0.03447    | 0.95716 |
| Alcohol (current and formerly)             | -0.03609    | 0.06683    | 0.59017 |
| Alcohol (years)                            | -0.00534    | 0.00555    | 0.36797 |
| Alcohol (standard drink units)             | -0.00273    | 0.00187    | 0.14841 |
| Injected drug user                         | -           | -          | -       |
| Baseline CD4 cell count                    | 0.00006     | 0.00005    | 0.21689 |
| Baseline CD4%                              | 0.00230     | 0.00214    | 0.28539 |
| Change in CD4 cell count                   | 0.00001     | 0.00007    | 0.91029 |
| Change in CD4%                             | -0.00012    | 0.00188    | 0.94989 |
| CD4 cell count at 6 years of follow-up     | 0.00007     | 0.00007    | 0.30141 |
| CD4% at 6 years of follow-up               | -0.00012    | 0.00177    | 0.94545 |
| CD8 cell count at 6 years of follow-up     | 0.00010     | 0.00006    | 0.10001 |
| CD8% at 6 years of follow-up               | -0.00093    | 0.00161    | 0.56632 |
| CD4/CD8 ratio at 6 years of follow-up      | -0.00273    | 0.01977    | 0.89036 |
| C-Reactive protein                         | -0.00582    | 0.00585    | 0.32192 |
| Glucose                                    | -0.00048    | 0.00078    | 0.53877 |
| Creatinine                                 | 0.00029     | 0.02419    | 0.99050 |
| Total cholesterol                          | 0.00054     | 0.00041    | 0.18994 |
| HDL cholesterol                            | 0.00193     | 0.00100    | 0.05529 |
| LDL cholesterol                            | 0.00025     | 0.00045    | 0.58269 |

|                                                           |          |         |         |
|-----------------------------------------------------------|----------|---------|---------|
| Triglycerides                                             | -0.00008 | 0.00027 | 0.76722 |
| Fibrinogen                                                | -0.00028 | 0.00025 | 0.26851 |
| D-dimer                                                   | -0.00005 | 0.00011 | 0.61464 |
| Positive CMV serology                                     | -0.04793 | 0.04615 | 0.30098 |
| Nadir CD4 cell count                                      | -0.00004 | 0.00014 | 0.77189 |
| Known time with HIV-1 infection (at 6 years of follow-up) | -0.00394 | 0.00251 | 0.11881 |
| Time virologically suppressed (at 6 years of follow-up)   | -0.00487 | 0.00778 | 0.53214 |
| Group TDF/TAF at baseline (ever)                          | 0.12322  | 0.07933 | 0.12286 |
| Group TDF/TAF at baseline (ever+current)                  | -0.05753 | 0.03371 | 0.09029 |
| Group TDF/TAF at 6 years of follow-up (Ever+current)      | -0.05753 | 0.03371 | 0.09029 |
| Group ABC at 6 years of follow-up (ever+current)          | 0.00425  | 0.03558 | 0.90512 |
| Group NRTIs at 6 years of follow-up (ever+current)        | -0.04784 | 0.03951 | 0.22821 |
| Time with ABC (years)                                     | -0.00519 | 0.00314 | 0.10257 |
| Time with NRTIs (years)                                   | -0.00519 | 0.00413 | 0.21083 |
| Time with TDF/TAF (years)                                 | -0.00183 | 0.00502 | 0.71744 |
| Chronic kidney disease at baseline                        | -0.07658 | 0.11187 | 0.49491 |
| Chronic kidney disease at 6 years follow-up               | 0.01961  | 0.06774 | 0.77268 |
| Hypertension at baseline                                  | -0.05714 | 0.03864 | 0.14173 |
| Hypertension at 6 years follow-up                         | -0.01484 | 0.03487 | 0.67121 |
| Diabetes mellitus at baseline                             | -0.04703 | 0.04368 | 0.28373 |
| Diabetes mellitus at 6 years follow-up                    | -0.06084 | 0.03792 | 0.11110 |
| Coronary artery disease at baseline                       | 0.14893  | 0.07905 | 0.06187 |
| Coronary artery disease at 6 years follow-up              | 0.11266  | 0.13911 | 0.41957 |
| Peripheral Artery Disease at baseline                     | -        | -       | -       |
| Peripheral Artery Disease at 6 years follow-up            | -0.27524 | 0.09860 | 0.00606 |
| 1 comorbidity                                             | 0.00089  | 0.04084 | 0.98266 |
| ≥2 comorbidities                                          | -0.06016 | 0.04420 | 0.17594 |



**Supplementary Table 2. Factors associated with changes in blood telomere length (T/S) after six years of follow-up.**

| Variable                                              | Coefficient | Std. Error | p       |
|-------------------------------------------------------|-------------|------------|---------|
| Baseline blood telomere length (T/S) x100             | -0.00043    | 0.00061    | 0.48019 |
| Baseline Age                                          | 0.00127     | 0.00161    | 0.43350 |
| Blood telomere length at 6 years follow-up (T/S) x100 | 0.00134     | 0.00045    | 0.00342 |
| Age at 6 years of follow-up                           | 0.00127     | 0.00150    | 0.40031 |
| Sex (Female)                                          | -0.00001    | 0.02221    | 0.99982 |
| Ethnicity (caucasian)                                 | -0.03137    | 0.03938    | 0.42714 |
| Risk factor (parenteral)                              | 0.06876     | 0.04726    | 0.14817 |
| Risk factor (sexual)                                  | 0.06875     | 0.04334    | 0.11520 |
| Income ( $\leq$ 12,000€/year)                         | -0.00708    | 0.01912    | 0.71182 |
| Previous AIDS                                         | -0.00967    | 0.01983    | 0.62670 |
| Education (university)                                | -0.00378    | 0.02003    | 0.85069 |
| Education (secondary)                                 | 0.01593     | 0.02568    | 0.53619 |
| Treatment with statins                                | -0.02257    | 0.02261    | 0.32016 |
| Treatment with metformin                              | 0.02261     | 0.03811    | 0.55412 |
| Active hepatitis C                                    | 0.06608     | 0.04855    | 0.17596 |
| Resolved hepatitis C                                  | 0.01667     | 0.02575    | 0.51850 |
| Body mass index                                       | -0.00012    | 0.00184    | 0.94940 |
| Smoker (current)                                      | -0.00398    | 0.03333    | 0.90521 |
| Smoker (formerly)                                     | 0.00057     | 0.03224    | 0.98598 |
| Smoker (current and formerly)                         | 0.01523     | 0.03119    | 0.62615 |
| Smoker (years)                                        | -0.00033    | 0.00092    | 0.72297 |
| Smoker (pack years)                                   | -0.00048    | 0.00025    | 0.05769 |
| Alcohol (current)                                     | -0.00212    | 0.02375    | 0.92909 |
| Alcohol (formerly)                                    | 0.06315     | 0.03787    | 0.09785 |
| Alcohol (current and formerly)                        | -0.00212    | 0.02233    | 0.92458 |
| Alcohol (years)                                       | -0.00211    | 0.00192    | 0.30837 |
| Alcohol (standard drink units)                        | -0.00029    | 0.00080    | 0.71947 |
| Injected drug user                                    | -           | -          | -       |
| Baseline CD4 cell count                               | -0.00006    | 0.00002    | 0.00428 |
| Baseline CD4%                                         | -0.00180    | 0.00103    | 0.08089 |
| Change in CD4 cell count                              | 0.00005     | 0.00005    | 0.31355 |
| Change in CD4%                                        | -0.00009    | 0.00148    | 0.95392 |
| CD4 cell count at 6 years of follow-up                | -0.00005    | 0.00002    | 0.00217 |
| CD4% at 6 years of follow-up                          | -0.00009    | 0.00108    | 0.93356 |
| CD8 cell count at 6 years of follow-up                | -0.00001    | 0.00004    | 0.89073 |
| CD8% at 6 years of follow-up                          | 0.00217     | 0.00128    | 0.09235 |
| CD4/CD8 ratio at 6 years of follow-up                 | -0.00243    | 0.01593    | 0.87910 |
| C-Reactive protein                                    | -0.00158    | 0.00199    | 0.42671 |
| Glucose                                               | -0.00040    |            | 0.18965 |
| Creatinine                                            | 0.00044     | 0.00753    | 0.95326 |
| Total cholesterol                                     | 0.00000     | 0.00028    | 0.99982 |
| HDL cholesterol                                       | 0.00112     | 0.00043    | 0.01114 |
| LDL cholesterol                                       | 0.00000     | 0.00036    | 0.99977 |

|                                                           |          |         |         |
|-----------------------------------------------------------|----------|---------|---------|
| Triglycerides                                             | -0.00008 | 0.00012 | 0.47837 |
| Fibrinogen                                                | 0.00002  | 0.00013 | 0.87496 |
| D-dimer                                                   | 0.00001  | 0.00004 | 0.82973 |
| Positive CMV serology                                     | 0.03302  | 0.01713 | 0.05616 |
| Nadir CD4 cell count                                      | 0.00008  | 0.00008 | 0.35211 |
| Known time with HIV-1 infection (at 6 years of follow-up) | -0.00220 | 0.00158 | 0.16734 |
| Time virologically suppressed (at 6 years of follow-up)   | -0.00187 | 0.00365 | 0.60845 |
| Group TDF/TAF at baseline (ever)                          | 0.02551  | 0.02380 | 0.28583 |
| Group TDF/TAF at baseline (ever+current)                  | -0.00001 | 0.01861 | 0.99978 |
| Group TDF/TAF at 6 years of follow-up (Ever+current)      | -0.00001 | 0.01861 | 0.99978 |
| Group ABC at 6 years of follow-up (ever+current)          | 0.00001  | 0.01894 | 0.99979 |
| Group NRTIs at 6 years of follow-up (ever+current)        | -0.01052 | 0.06517 | 0.87204 |
| Time with ABC (years)                                     | -0.00353 | 0.00260 | 0.17827 |
| Time with NRTIs (years)                                   | 0.00009  | 0.00231 | 0.96847 |
| Time with TDF/TAF (years)                                 | 0.00234  | 0.00336 | 0.48917 |
| Chronic kidney disease at baseline                        | 0.03527  | 0.01936 | 0.07080 |
| Chronic kidney disease at 6 years follow-up               | 0.03527  | 0.02160 | 0.10493 |
| Hypertension at baseline                                  | 0.00001  | 0.01884 | 0.99978 |
| Hypertension at 6 years follow-up                         | 0.00001  | 0.01884 | 0.99978 |
| Diabetes mellitus at baseline                             | 0.00001  | 0.02529 | 0.99984 |
| Diabetes mellitus at 6 years follow-up                    | 0.00001  | 0.01869 | 0.99978 |
| Coronary artery disease at baseline                       | -0.02953 | 0.01688 | 0.08262 |
| Coronary artery disease at 6 years follow-up              | -0.02953 | 0.05634 | 0.60116 |
| Peripheral Artery Disease at baseline                     | -        | -       | -       |
| Peripheral Artery Disease at 6 years follow-up            | 0.00144  | 0.03514 | 0.96739 |
| 1 comorbidity                                             | -0.01537 | 0.02546 | 0.54720 |
| ≥2 comorbidities                                          | 0.00144  | 0.01972 | 0.94191 |

**Supplementary Table 3. Factors associated with similarity of blood telomere length to healthy blood donors (within an established range of  $\pm 10\%$ ).**

| Category                                                              | Overall                       | Worse                     | Similar or better         | p      |
|-----------------------------------------------------------------------|-------------------------------|---------------------------|---------------------------|--------|
| n                                                                     | 128                           | 78                        | 50                        |        |
| Baseline blood telomere length (T/S, median [IQR])                    | 1.04 [0.93, 1.16]             | 1.00 [0.91, 1.10]         | 1.10 [1.00, 1.24]         | 0.001  |
| Change in blood telomere length at 6 years (T/S, median [IQR])        | 0.02 [-0.02, 0.08]            | 0.00 [-0.03, 0.06]        | 0.06 [-0.01, 0.08]        | 0.003  |
| Blood telomere length at 6 years (T/S, median [IQR])                  | 1.07 [0.95, 1.17]             | 1.02 [0.91, 1.10]         | 1.12 [1.03, 1.27]         | <0.001 |
| Sex (%)                                                               | Men                           | 93 (72.7)                 | 59 (68.0)                 | 0.457  |
|                                                                       | Female                        | 35 (27.3)                 | 19 (32.0)                 |        |
| Age at 6 years follow-up (years, median [IQR])                        | 55.00 [51.00, 58.25]          | 53.50 [50.00, 58.00]      | 56.00 [52.00, 58.75]      | 0.060  |
| Ethnicity (%)                                                         | Caucasian                     | 118 (92.2)                | 72 (92.3)                 | 1.000  |
|                                                                       | Other                         | 10 (7.8)                  | 6 (7.7)                   |        |
| Risk factor (%)                                                       | Unknown                       | 4 (3.1)                   | 3 (3.8)                   | 0.802  |
|                                                                       | Parenteral                    | 41 (32.0)                 | 24 (30.8)                 |        |
|                                                                       | Sexual                        | 83 (64.8)                 | 51 (65.4)                 |        |
| Income (%)                                                            | Higher (> 12,000 €/year)      | 78 (60.9)                 | 49 (62.8)                 | 0.719  |
|                                                                       | Lower ( $\leq$ 12,000 €/year) | 50 (39.1)                 | 29 (37.2)                 |        |
| Previous AIDS                                                         | FALSE                         | 56 (43.8)                 | 30 (38.5)                 | 0.186  |
|                                                                       | TRUE                          | 72 (56.2)                 | 48 (61.5)                 |        |
| Treatment with statins (%)                                            | FALSE                         | 86 (67.2)                 | 50 (64.1)                 | 0.462  |
|                                                                       | TRUE                          | 42 (32.8)                 | 28 (35.9)                 |        |
| Treatment with metformin (%)                                          | FALSE                         | 119 (93.0)                | 72 (92.3)                 | 0.991  |
|                                                                       | TRUE                          | 9 (7.0)                   | 6 (7.7)                   |        |
| Hepatitis C virus (%)                                                 | Active                        | 2 (1.6)                   | 2 (2.6)                   | 0.510  |
|                                                                       | No                            | 82 (64.1)                 | 50 (64.1)                 |        |
|                                                                       | Resolved                      | 44 (34.4)                 | 26 (33.3)                 |        |
| Smoking (%)                                                           | Current                       | 59 (46.1)                 | 32 (41.0)                 | 0.179  |
|                                                                       | Formerly                      | 41 (32.0)                 | 25 (32.1)                 |        |
|                                                                       | Never                         | 28 (21.9)                 | 21 (26.9)                 |        |
| Smoking combined (%)                                                  | Current and formerly          | 100 (78.1)                | 57 (73.1)                 | 0.132  |
|                                                                       | Never                         | 28 (21.9)                 | 21 (26.9)                 |        |
| Alcohol (%)                                                           | Current                       | 7 (5.5)                   | 5 (6.4)                   | 0.178  |
|                                                                       | Formerly                      | 2 (1.6)                   | 0 (0.0)                   |        |
|                                                                       | Never                         | 119 (93.0)                | 73 (93.6)                 |        |
| Alcohol combined (%)                                                  | Current and formerly          | 9 (7.0)                   | 5 (6.4)                   | 1000   |
|                                                                       | Never                         | 119 (93.0)                | 73 (93.6)                 |        |
| Baseline CD4 cell count (cells/ $\mu$ L, median [IQR])                | 769.15 [580.28, 1,040.25]     | 785.20 [546.80, 1,027.65] | 731.20 [585.00, 1,039.65] | 0.971  |
| Baseline CD4% (median [IQR])                                          | 37.00 [29.75, 42.25]          | 37.00 [31.00, 40.75]      | 37.00 [29.00, 42.75]      | 0.841  |
| CD4 cell count at 6 years of follow-up (cells/ $\mu$ L, median [IQR]) | 773.50 [540.00, 1,020.00]     | 710.00 [535.00, 980.00]   | 780.00 [570.00, 1,050.00] | 0.623  |
| CD4% at 6 years of follow-up (median [IQR])                           | 37.00 [31.00, 42.61]          | 37.00 [31.00, 42.75]      | 36.00 [32.00, 42.61]      | 0.940  |

|                                                                               |               |                         |                         |                         |       |
|-------------------------------------------------------------------------------|---------------|-------------------------|-------------------------|-------------------------|-------|
| Change in CD4 cell count (cells/ $\mu$ L, median [IQR])                       |               | -4.80 [-157.78, 96.60]  | -65.00 [-179.30, 82.40] | 9.00 [-148.00, 146.60]  | 0.330 |
| Change in CD4% (cells/ $\mu$ L, median [IQR])                                 |               | 1.00 [-2.50, 5.00]      | 1.00 [-2.25, 4.00]      | 3.00 [-2.50, 6.00]      | 0.123 |
| CD8 cell count at 6 years of follow-up (cells/ $\mu$ L, median [IQR])         |               | 674.00 [470.00, 930.00] | 675.00 [462.50, 895.00] | 674.00 [495.00, 985.00] | 0.541 |
| CD8% at 6 years of follow-up (median [IQR])                                   |               | 33.00 [29.00, 40.00]    | 34.00 [29.50, 40.00]    | 33.00 [28.50, 40.50]    | 0.823 |
| CD4/CD8 ratio at 6 years of follow-up (median [IQR])                          |               | 1.11 [0.80, 1.44]       | 1.09 [0.79, 1.44]       | 1.15 [0.81, 1.42]       | 0.987 |
| C-Reactive protein (mg/l, median [IQR])                                       |               | 1.30 [0.00, 4.27]       | 1.40 [0.00, 4.70]       | 0.80 [-0.00, 3.10]      | 0.343 |
| Glucose (mg/dl, median [IQR])                                                 |               | 91.00 [82.75, 101.00]   | 91.00 [82.25, 100.50]   | 91.00 [84.00, 100.75]   | 0.044 |
| Creatinine (mg/dl, median [IQR])                                              |               | 0.85 [0.75, 0.93]       | 0.84 [0.74, 0.95]       | 0.85 [0.75, 0.92]       | 0.760 |
| Cholesterol (mg/dl, median [IQR])                                             |               | 181.00 [152.00, 204.25] | 177.00 [148.00, 205.75] | 182.00 [161.25, 204.00] | 0.596 |
| HDL cholesterol (mg/dl, median [IQR])                                         |               | 48.50 [39.00, 58.00]    | 45.50 [37.25, 56.75]    | 52.00 [43.25, 58.75]    | 0.062 |
| LDL cholesterol (mg/dl, median [IQR])                                         |               | 108.00 [85.00, 131.00]  | 108.00 [82.75, 132.75]  | 108.00 [86.00, 129.25]  | 0.721 |
| Triglycerides (mg/dl, median [IQR])                                           |               | 97.50 [75.75, 151.25]   | 102.50 [76.25, 158.25]  | 87.50 [74.50, 127.50]   | 0.283 |
| Fibrinogen (mg/dl, median [IQR])                                              |               | 308.00 [260.00, 372.75] | 302.00 [247.50, 374.00] | 318.00 [272.50, 360.50] | 0.572 |
| D-Dimer (ng/ml, median [IQR])                                                 |               | 220.00 [170.00, 312.50] | 210.00 [170.00, 335.00] | 220.00 [170.00, 290.00] | 0.638 |
| Positive CMV serology (%)                                                     | NO            | 12 (9.4)                | 9 (11.5)                | 3 (6.0)                 | 0.460 |
|                                                                               | YES           | 116 (90.6)              | 69 (88.5)               | 47 (94.0)               |       |
| Nadir CD4 count (cells/ $\mu$ L, median [IQR])                                |               | 181.50 [80.50, 255.00]  | 182.50 [82.50, 258.25]  | 180.50 [79.50, 248.75]  | 0.764 |
| Known time with HIV-1 infection (years, median [IQR])                         |               | 23.58 [18.46, 27.93]    | 23.33 [18.48, 27.75]    | 23.95 [18.67, 28.36]    | 0.600 |
| Time virologically suppressed (at 6 years of follow-up) (years, median [IQR]) |               | 13.23 [12.07, 13.67]    | 13.15 [11.03, 13.62]    | 13.47 [12.59, 13.75]    | 0.248 |
| Comorbidities (%)                                                             | 1             | 29 (22.7)               | 15 (19.2)               | 14 (28.0)               | 0.482 |
|                                                                               | 2 or more     | 24 (18.8)               | 16 (20.5)               | 8 (16.0)                |       |
|                                                                               | No            | 75 (58.6)               | 47 (60.3)               | 28 (56.0)               |       |
| Group TDF/TAF at 6 years of follow-up (%)                                     | Ever + Actual | 64 (50.0)               | 39 (50.0)               | 25 (50.0)               | 1.000 |
|                                                                               | Never         | 64 (50.0)               | 39 (50.0)               | 25 (50.0)               |       |
| Group ABC at 6 years of follow-up (%)                                         | Ever + Actual | 76 (59.4)               | 48 (61.5)               | 28 (56.0)               | 0.661 |
|                                                                               | Never         | 52 (40.6)               | 30 (38.5)               | 22 (44.0)               |       |
| Group NRTI at 6 years of follow-up (%)                                        | Ever + Actual | 120 (93.8)              | 76 (97.4)               | 44 (88.0)               | 0.005 |
|                                                                               | Never         | 8 (6.2)                 | 2 (2.6)                 | 6 (12.0)                |       |
| Time with ABC (years, median [IQR])                                           |               | 9.83 [5.14, 12.91]      | 10.31 [8.03, 13.21]     | 6.96 [4.10, 12.91]      | 0.154 |
| Time with NRTIs (years, median [IQR])                                         |               | 14.33 [9.96, 16.82]     | 14.46 [9.96, 16.79]     | 14.02 [10.67, 16.91]    | 0.845 |
| Time with TDF/TAF (years, median [IQR])                                       |               | 15.47 [11.52, 16.93]    | 15.60 [11.40, 16.95]    | 14.39 [11.52, 16.84]    | 0.788 |

**Supplementary Table 4. Factors associated with similarity of blood telomere length to the elderly population group (within an established range of  $\pm 10\%$ ).**

| Category                                                              |                               | Overall                   | Similar or worse          | Better                    | p      |
|-----------------------------------------------------------------------|-------------------------------|---------------------------|---------------------------|---------------------------|--------|
| n                                                                     |                               | 128                       | 42                        | 86                        |        |
| Baseline blood telomere length (T/S, median [IQR])                    |                               | 1.04 [0.93, 1.16]         | 0.93 [0.84, 1.00]         | 1.09 [1.01, 1.22]         | <0.001 |
| Change in blood telomere length (T/S, median [IQR])                   |                               | 0.02 [-0.02, 0.08]        | 0.02 [-0.02, 0.06]        | 0.03 [-0.02, 0.08]        | 0.429  |
| Blood telomere length at 6 years (T/S, median [IQR])                  |                               | 1.07 [0.95, 1.17]         | 0.95 [0.89, 1.03]         | 1.11 [1.03, 1.23]         | <0.001 |
| Sex (%)                                                               | Men                           | 93 ( 72.7)                | 32 ( 76.2)                | 61 ( 70.9)                | 0.678  |
|                                                                       | Female                        | 35 ( 27.3)                | 10 ( 23.8)                | 25 ( 29.1)                |        |
| Age at 6 years follow-up (years, median [IQR])                        |                               | 55.00 [51.00, 58.25]      | 55.00 [51.00, 59.00]      | 54.50 [50.00, 57.00]      | 0.364  |
| Ethnicity (%)                                                         | Caucasian                     | 118 ( 92.2)               | 39 ( 92.9)                | 79 ( 91.9)                | 1.000  |
|                                                                       | Other                         | 10 ( 7.8)                 | 3 ( 7.1)                  | 7 ( 8.1)                  |        |
| Risk factor (%)                                                       | Unknown                       | 4 ( 3.1)                  | 1 ( 2.4)                  | 3 ( 3.5)                  | 0.929  |
|                                                                       | Parenteral                    | 41 ( 32.0)                | 14 ( 33.3)                | 27 ( 31.4)                |        |
|                                                                       | Sexual                        | 83 ( 64.8)                | 27 ( 64.3)                | 56 ( 65.1)                |        |
| Income (%)                                                            | Higher (> 12,000 €/year)      | 78 ( 60.9)                | 25 ( 59.5)                | 53 ( 61.6)                | 0.971  |
|                                                                       | Lower ( $\leq$ 12,000 €/year) | 50 ( 39.1)                | 17 ( 40.5)                | 33 ( 38.4)                |        |
| Previous AIDS (%)                                                     | FALSE                         | 56 ( 43.8)                | 16 ( 38.1)                | 40 ( 46.5)                | 0.477  |
|                                                                       | TRUE                          | 72 ( 56.2)                | 26 ( 61.9)                | 46 ( 53.5)                |        |
| Treatment with statins (%)                                            | FALSE                         | 86 ( 67.2)                | 27 ( 64.3)                | 59 ( 68.6)                | 0.773  |
|                                                                       | TRUE                          | 42 ( 32.8)                | 15 ( 35.7)                | 27 ( 31.4)                |        |
| Treatment with metformin (%)                                          | FALSE                         | 119 ( 93.0)               | 38 ( 90.5)                | 81 ( 94.2)                | 0.687  |
|                                                                       | TRUE                          | 9 ( 7.0)                  | 4 ( 9.5)                  | 5 ( 5.8)                  |        |
| Hepatitis C virus (%)                                                 | Active                        | 2 ( 1.6)                  | 2 ( 4.8)                  | 0 ( 0.0)                  | 0.125  |
|                                                                       | No                            | 82 ( 64.1)                | 26 ( 61.9)                | 56 ( 65.1)                |        |
|                                                                       | Resolved                      | 44 ( 34.4)                | 14 ( 33.3)                | 30 ( 34.9)                |        |
| Smoking (%)                                                           | Current                       | 59 ( 46.1)                | 15 ( 35.7)                | 44 ( 51.2)                | 0.222  |
|                                                                       | Formerly                      | 41 ( 32.0)                | 15 ( 35.7)                | 26 ( 30.2)                |        |
|                                                                       | Never                         | 28 ( 21.9)                | 12 ( 28.6)                | 16 ( 18.6)                |        |
| Smoking combined (%)                                                  | Current and formerly          | 100 ( 78.1)               | 30 ( 71.4)                | 70 ( 81.4)                | 0.292  |
|                                                                       | Never                         | 28 ( 21.9)                | 12 ( 28.6)                | 16 ( 18.6)                |        |
| Alcohol (%)                                                           | Current                       | 7 ( 5.5)                  | 1 ( 2.4)                  | 6 ( 7.0)                  | 0.331  |
|                                                                       | Formerly                      | 2 ( 1.6)                  | 0 ( 0.0)                  | 2 ( 2.3)                  |        |
|                                                                       | Never                         | 119 ( 93.0)               | 41 ( 97.6)                | 78 ( 90.7)                |        |
| Alcohol combined (%)                                                  | Current and formerly          | 9 ( 7.0)                  | 1 ( 2.4)                  | 8 ( 9.3)                  | 0.285  |
|                                                                       | Never                         | 119 ( 93.0)               | 41 ( 97.6)                | 78 ( 90.7)                |        |
| Baseline CD4 cell count (cells/ $\mu$ L, median [IQR])                |                               | 769.15 [580.28, 1,040.25] | 685.10 [486.38, 1,004.05] | 795.90 [599.20, 1,045.95] | 0.238  |
| Baseline CD4% (median [IQR])                                          |                               | 37.00 [29.75, 42.25]      | 35.00 [29.00, 40.00]      | 38.00 [30.00, 43.00]      | 0.132  |
| CD4 cell count at 6 years of follow-up (cells/ $\mu$ L, median [IQR]) |                               | 773.50 [540.00, 1,020.00] | 670.00 [528.50, 914.00]   | 785.00 [560.00, 1,035.00] | 0.224  |
| CD4% at 6 years of follow-up (median [IQR])                           |                               | 37.00 [31.00, 42.61]      | 35.50 [30.00, 39.50]      | 38.00 [31.00, 45.00]      | 0.307  |

|                                                                               |               |                         |                         |                         |       |
|-------------------------------------------------------------------------------|---------------|-------------------------|-------------------------|-------------------------|-------|
| Change in CD4 cell count (cells/ $\mu$ L, median [IQR])                       |               | -4.80 [-157.78, 96.60]  | 27.60 [-127.83, 75.57]  | -6.50 [-185.65, 117.25] | 0.605 |
| Change in CD4% (median [IQR])                                                 |               | 1.00 [-2.50, 5.00]      | 1.00 [-2.00, 5.50]      | 2.00 [-3.00, 5.00]      | 0.996 |
| CD8 cell count at 6 years of follow-up (cells/ $\mu$ L, median [IQR])         |               | 674.00 [470.00, 930.00] | 650.00 [460.00, 836.25] | 674.00 [495.00, 950.00] | 0.310 |
| CD8% at 6 years of follow-up (median [IQR])                                   |               | 33.00 [29.00, 40.00]    | 33.00 [30.00, 39.75]    | 33.50 [28.00, 40.25]    | 0.857 |
| CD4/CD8 ratio at 6 years of follow-up (median [IQR])                          |               | 1.11 [0.80, 1.44]       | 1.05 [0.80, 1.31]       | 1.15 [0.80, 1.47]       | 0.620 |
| C-Reactive protein (mg/l, median [IQR])                                       |               | 1.30 [0.00, 4.27]       | 0.80 [0.00, 3.00]       | 1.40 [0.00, 4.40]       | 0.212 |
| Glucose (mg/dl, median [IQR])                                                 |               | 91.00 [82.75, 101.00]   | 95.50 [88.00, 107.50]   | 88.50 [81.00, 96.00]    | 0.001 |
| Creatinine (mg/dl, median [IQR])                                              |               | 0.85 [0.75, 0.93]       | 0.86 [0.80, 0.94]       | 0.84 [0.73, 0.93]       | 0.443 |
| Total cholesterol (mg/dl, median [IQR])                                       |               | 181.00 [152.00, 204.25] | 182.50 [152.00, 205.75] | 180.50 [154.00, 204.00] | 0.957 |
| HDL cholesterol (mg/dl, median [IQR])                                         |               | 48.50 [39.00, 58.00]    | 47.50 [37.25, 58.00]    | 48.50 [40.00, 58.75]    | 0.490 |
| LDL cholesterol (mg/dl, median [IQR])                                         |               | 108.00 [85.00, 131.00]  | 104.50 [86.25, 131.75]  | 109.00 [82.25, 130.75]  | 0.755 |
| Triglycerides (mg/dl, median [IQR])                                           |               | 97.50 [75.75, 151.25]   | 99.00 [75.25, 162.75]   | 97.50 [78.00, 138.50]   | 0.815 |
| Fibrinogen (mg/dl, median [IQR])                                              |               | 308.00 [260.00, 372.75] | 293.00 [244.00, 373.50] | 317.00 [269.50, 367.50] | 0.241 |
| D-Dimer (ng/ml, median [IQR])                                                 |               | 220.00 [170.00, 312.50] | 192.00 [170.00, 270.00] | 230.00 [170.00, 345.00] | 0.195 |
| Positive CMV serology (%)                                                     | NO            | 12 ( 9.4)               | 5 ( 11.9)               | 7 ( 8.1)                | 0.716 |
|                                                                               | YES           | 116 ( 90.6)             | 37 ( 88.1)              | 79 ( 91.9)              |       |
| Nadir CD4 count (cells/ $\mu$ L, median [IQR])                                |               | 181.50 [80.50, 255.00]  | 139.00 [37.25, 244.75]  | 186.50 [102.00, 255.00] | 0.230 |
| Known time with HIV-1 infection (years, median [IQR])                         |               | 23.58 [18.46, 27.93]    | 22.84 [19.73, 28.85]    | 23.82 [17.60, 27.87]    | 0.476 |
| Time virologically suppressed (at 6 years of follow-up) (years, median [IQR]) |               | 13.23 [12.07, 13.67]    | 13.30 [12.80, 13.56]    | 13.12 [10.59, 13.68]    | 0.321 |
| Comorbidities (%)                                                             | 1             | 29 ( 22.7)              | 7 ( 16.7)               | 22 ( 25.6)              | 0.510 |
|                                                                               | 2 or more     | 24 ( 18.8)              | 9 ( 21.4)               | 15 ( 17.4)              |       |
|                                                                               | No            | 75 ( 58.6)              | 26 ( 61.9)              | 49 ( 57.0)              |       |
| Group TDF/TAF at 6 years of follow-up (%)                                     | Ever + Actual | 64 (50.0)               | 27 ( 64.3)              | 37 (43.0)               | 0.038 |
|                                                                               | Never         | 64 (50.0)               | 15 ( 35.7)              | 49 (57.0)               |       |
| Group ABC at 6 years of follow-up (%)                                         | Ever + Actual | 76 (59.4)               | 23 ( 54.8)              | 53 (61.6)               | 0.582 |
|                                                                               | Never         | 52 (40.6)               | 19 ( 45.2)              | 33 (38.4)               |       |
| Group NRTI at 6 years of follow-up (%)                                        | Ever + Actual | 120 (93.8)              | 42 (100.0)              | 78 (90.7)               | 0.098 |
|                                                                               | Never         | 8 ( 6.2)                | 0 ( 0.0)                | 8 ( 9.3)                |       |
| Time with ABC (years, median [IQR])                                           |               | 9.83 [5.14, 12.91]      | 10.32 [6.81, 14.31]     | 9.77 [4.88, 12.88]      | 0.456 |
| Time with NRTIs (years, median [IQR])                                         |               | 14.33 [9.96, 16.82]     | 15.91 [11.20, 17.11]    | 12.97 [9.78, 15.87]     | 0.016 |
| Time with TDF/TAF (years, median [IQR])                                       |               | 15.47 [11.52, 16.93]    | 16.08 [12.77, 17.10]    | 13.57 [11.49, 16.81]    | 0.148 |
